# Supplementary material for: A comparative analysis of NLRP3-related inflammatory mediators in synovial fluid in temporomandibular joint osteoarthritis and internal derangement
Source: BMC Musculoskelet Disord. 2021 Feb 26;22:229. doi: 10.1186/s12891-021-04092-0 (PMC7913283; doi:10.1186/s12891-021-04092-0)
Supplement: Supplementary file 2 — Additional file 2. [file 12891_2021_4092_MOESM2_ESM.xlsx]

## Sheet: Sheet1
number	First expression of NLRP3（ng/ml）	Second expression of NLRP3(ng/ml)	First expression of CASP1（pmol/L）	Second expresssion of CASP1(pmol/L)	First expression of IL-1β（pg/ml）	Second expresssion of IL-1β（pg/ml）	First expression of IL-18（pg/ml）	Second expresssion of IL-18（pg/ml）
1	0.518523	0.41	108.54	108.85	130.45	70.64	448.24	8.86
2	0.521525	0.4113	155.16	114.59	240.7	123.32	432.78	188.64
3	0.46864	0.4035	135	135.59	337.94	112.84	492.1	77.08
4	0.61112	0.4374	169.55	172.59	379.54	137.7	507.98	61.7
5	0.61423	0.4386	183.81	169.19	379.54	219.7	482.63	116.16
6	0.605451	0.4353	203.18	217.83	561.26	187.28	429.69	56.6
7	0.600673	0.4335	190.95	174.64	585.47	102.63	423.55	183.17
8	0.542357	0.416	173.58	230.09	619.32	148.75	420.48	61.69
9	0.604008	0.435	205.14	151.07	633.8	183.32	399.14	100.43
10	0.624658	0.4427	212.17	207.9	734.4	102.63	396.1	342.25
11	0.517323	0.4105	155.96	127.2	733.88	431.38	354.1	180.45
12	0.587689	0.429	133.8	145.3	841.9	379.54	354.1	327.53
13	0.420259	0.4015	144.99	145.05	882.9	479.19	354.1	263.97
14	0.45357	0.4024	143.19	186.38	891.92	415.73	342.25	110.9
15	0.489322	0.4059	142.8	165.05	984.52	503.23	339.29	180.45
16	0.561112	0.4208	161.82	174.32	940.93	460	330.46	43.91
17	0.576319	0.4253	151.9	185.05	984.5	266.49	327.53	1.44
18	0.463692	0.4031	204.58	239.84	954.1	488.81	324.59	71.94
